# Supplementary material for: Association between Proton Pump Inhibitor Use and Risk of Hepatocellular Carcinoma: A Korean Nationally Representative Cohort Study
Source: MDPI journal article supplement (doi:10.3390/jcm11102865), 2022-05-19
Supplement: s1 [file s1]

**Supplementary Table S1.** Association of PPI use with risk of liver cancer among various risk groups.

|                              | <b>Non-User</b>  | <b>First tertile</b> | <b>Second tertile</b> | <b>Third tertile</b> | <b>P for trend</b> |
|------------------------------|------------------|----------------------|-----------------------|----------------------|--------------------|
| Participant, n               | 341,734          | 24,344               | 18,666                | 21,313               |                    |
| Overall HCC                  |                  |                      |                       |                      |                    |
| Event (%)                    | 1,215 (0.4)      | 95 (0.4)             | 75 (0.4)              | 81 (0.4)             |                    |
| Person-year                  | 2,334,893        | 166,230              | 127,059               | 144,325              |                    |
| Crude rate/10,000 PY         | 5.2              | 5.7                  | 5.9                   | 5.6                  |                    |
| HR (95% CI)                  | 1.00 (reference) | 1.10 (0.89-1.35)     | 1.13 (0.90-1.43)      | 1.08 (0.86-1.35)     | 0.556              |
| aHR (95% CI) <sup>a</sup>    | 1.00 (reference) | 1.11 (0.90-1.36)     | 1.09 (0.87-1.38)      | 0.96 (0.77-1.20)     | 0.665              |
| aHR (95% CI) <sup>b</sup>    | 1.00 (reference) | 1.07 (0.86-1.31)     | 1.05 (0.83-1.33)      | 0.91 (0.72-1.14)     | 0.731              |
| cirrhosis-associated HCC     |                  |                      |                       |                      |                    |
| Event (%)                    | 236 (0.1)        | 16 (0.1)             | 12 (0.1)              | 18 (0.1)             |                    |
| Person-year                  | 2,330,710        | 165,845              | 126,794               | 143,926              |                    |
| Crude rate/10,000 PY         | 1.0              | 1.0                  | 0.9                   | 1.3                  |                    |
| HR (95% CI)                  | 1.00 (reference) | 0.95 (0.57-1.58)     | 0.93 (0.52-1.67)      | 1.23 (0.76-1.99)     | 0.832              |
| aHR (95% CI) <sup>a</sup>    | 1.00 (reference) | 0.96 (0.58-1.59)     | 0.90 (0.51-1.61)      | 1.10 (0.68-1.78)     | 0.954              |
| aHR (95% CI) <sup>b</sup>    | 1.00 (reference) | 0.96 (0.57-1.59)     | 0.90 (0.50-1.61)      | 1.08 (0.66-1.75)     | 0.966              |
| Non-cirrhosis-associated HCC |                  |                      |                       |                      |                    |
| Event (%)                    | 979 (0.3)        | 79 (0.3)             | 63 (0.3)              | 63 (0.3)             |                    |
| Person-year                  | 2,335,303        | 166,256              | 127,084               | 144,362              |                    |
| Crude rate/10,000 PY         | 4.2              | 4.8                  | 5.0                   | 4.4                  |                    |
| HR (95% CI)                  | 1.00 (reference) | 1.13 (0.90-1.43)     | 1.18 (0.92-1.53)      | 1.04 (0.81-1.34)     | 0.446              |
| aHR (95% CI) <sup>a</sup>    | 1.00 (reference) | 1.14 (0.91-1.44)     | 1.14 (0.88-1.47)      | 0.93 (0.72-1.20)     | 0.446              |
| aHR (95% CI) <sup>b</sup>    | 1.00 (reference) | 1.09 (0.87-1.37)     | 1.09 (0.84-1.40)      | 0.87 (0.67-1.13)     | 0.527              |

HR calculated using the Cox proportional hazards regression.

<sup>a</sup>adjusted for age and sex.

<sup>b</sup>adjusted for age, sex, household income, body mass index, systolic blood pressure, fasting serum glucose, smoking, alcohol consumption, exercise frequency, and Charlson comorbidity index.

Acronyms: DDD, defined daily dose; HCC, hepatocellular carcinoma; PY, person-year; HR, hazard ratio; aHR, adjusted hazard ratio; CI, confidence interval.

**Supplementary Table S2.** Sensitivity analysis on association of proton pump inhibitor use with risk of HCC after excluding events occurred in specified latent periods.

|                                 | None             | Low<br>(0 ≤ PPI < 30<br>DDD <sub>s</sub> ) | Intermediate<br>(30 ≤ PPI < 60<br>DDD <sub>s</sub> ) | High<br>(≥60 DDD <sub>s</sub> ) | P for trend |
|---------------------------------|------------------|--------------------------------------------|------------------------------------------------------|---------------------------------|-------------|
| Overall HCC                     |                  |                                            |                                                      |                                 |             |
| 1-year washed out               | 1.00 (reference) | 1.04 (0.86-1.26)                           | 0.94 (0.70-1.30)                                     | 0.89 (0.63-1.24)                | 0.828       |
| 2-year washed out               | 1.00 (reference) | 1.02 (0.83-1.26)                           | 0.83 (0.59-1.17)                                     | 0.70 (0.47-1.05)                | 0.248       |
| 3-year washed out               | 1.00 (reference) | 1.02 (0.81-1.29)                           | 0.79 (0.53-1.16)                                     | 0.69 (0.44-1.09)                | 0.268       |
| Cirrhosis-associated HCC        |                  |                                            |                                                      |                                 |             |
| 1-year washed out               | 1.00 (reference) | 0.98 (0.63-1.51)                           | 0.83 (0.41-1.69)                                     | 1.37 (0.74-2.53)                | 0.717       |
| 2-year washed out               | 1.00 (reference) | 0.91 (0.57-1.47)                           | 0.71 (0.31-1.59)                                     | 0.84 (0.37-1.90)                | 0.814       |
| 3-year washed out               | 1.00 (reference) | 0.86 (0.50-1.46)                           | 0.57 (0.21-1.53)                                     | 0.68 (0.25-1.84)                | 0.572       |
| Non-cirrhosis-associated<br>HCC |                  |                                            |                                                      |                                 |             |
| 1-year washed out               | 1.00 (reference) | 1.06 (0.86-1.30)                           | 0.97 (0.70-1.35)                                     | 0.77 (0.51-1.14)                | 0.546       |
| 2-year washed out               | 1.00 (reference) | 1.05 (0.84-1.32)                           | 0.86 (0.59-1.25)                                     | 0.66 (0.41-1.06)                | 0.282       |
| 3-year washed out               | 1.00 (reference) | 1.07 (0.83-1.38)                           | 0.85 (0.55-1.30)                                     | 0.70 (0.42-1.16)                | 0.416       |

Data are adjusted hazard ratio calculated using the Cox proportional hazards regression after adjustments for age, sex, household income, body mass index, systolic blood pressure, fasting serum glucose, smoking, alcohol consumption, exercise frequency, and Charlson comorbidity index.

Acronyms: DDD<sub>s</sub>, defined daily dose; HCC, hepatocellular carcinoma; HR, hazard ratio; aHR, adjusted hazard ratio; CI, confidence interval.

**Supplementary Table S3.** Stratified analyses of association of proton pump inhibitor use with risk of overall hepatocellular carcinoma.

| aHR (95% CI) by the defined daily dose of PPI use during 4 years |         |       |                  |                            |                                      |                    |             |                   |
|------------------------------------------------------------------|---------|-------|------------------|----------------------------|--------------------------------------|--------------------|-------------|-------------------|
|                                                                  | Total   | Event | None             | Low<br>(0 ≤ PPI < 30 DDDs) | Intermediate<br>(30 ≤ PPI < 60 DDDs) | High<br>(≥60 DDDs) | P for trend | P for interaction |
| Age                                                              |         |       |                  |                            |                                      |                    |             |                   |
| <60 years                                                        | 295,141 | 894   | 1.00 (reference) | 0.99 (0.79-1.24)           | 0.98 (0.69-1.39)                     | 0.77 (0.49-1.21)   | 0.726       | 0.445             |
| ≥60 years                                                        | 110,916 | 572   | 1.00 (reference) | 1.21 (0.94-1.57)           | 0.97 (0.64-1.47)                     | 1.07 (0.70-1.63)   | 0.519       |                   |
| Sex                                                              |         |       |                  |                            |                                      |                    |             |                   |
| Men                                                              | 215,550 | 1,116 | 1.00 (reference) | 1.04 (0.86-1.27)           | 1.00 (0.74-1.35)                     | 0.84 (0.58-1.20)   | 0.754       | 0.695             |
| Women                                                            | 190,507 | 350   | 1.00 (reference) | 1.20 (0.86-1.67)           | 0.88 (0.48-1.61)                     | 1.16 (0.63-2.12)   | 0.674       |                   |
| Household income                                                 |         |       |                  |                            |                                      |                    |             |                   |
| Low half                                                         | 150,613 | 609   | 1.00 (reference) | 1.32 (1.03-1.70)           | 1.43 (1.10-2.05)                     | 0.96 (0.60-1.54)   | 0.046       | 0.013             |
| Upper half                                                       | 255,444 | 857   | 1.00 (reference) | 0.93 (0.74-1.17)           | 0.68 (0.45-1.03)                     | 0.86 (0.57-1.30)   | 0.263       |                   |
| Obesity (≥25 kg/m <sup>2</sup> )                                 |         |       |                  |                            |                                      |                    |             |                   |
| Yes                                                              | 140,057 | 512   | 1.00 (reference) | 1.00 (0.75-1.34)           | 0.76 (0.46-1.26)                     | 0.63 (0.35-1.15)   | 0.346       | 0.385             |
| No                                                               | 266,000 | 954   | 1.00 (reference) | 1.13 (0.91-1.39)           | 1.10 (0.80-1.52)                     | 1.06 (0.74-1.53)   | 0.675       |                   |
| Charlson Comorbidity Index                                       |         |       |                  |                            |                                      |                    |             |                   |
| 0                                                                | 179,113 | 554   | 1.00 (reference) | 1.08 (0.77-1.52)           | 1.26 (0.75-2.10)                     | 1.01 (0.48-2.13)   | 0.819       | 0.702             |
| ≥1                                                               | 226,944 | 912   | 1.00 (reference) | 1.08 (0.89-1.31)           | 0.90 (0.65-1.23)                     | 0.88 (0.63-1.24)   | 0.631       |                   |
| Smoking                                                          |         |       |                  |                            |                                      |                    |             |                   |
| Yes                                                              | 116,169 | 662   | 1.00 (reference) | 1.06 (0.82-1.36)           | 0.99 (0.66-1.46)                     | 1.12 (0.75-1.70)   | 0.927       | 0.560             |
| No                                                               | 289,888 | 804   | 1.00 (reference) | 1.10 (0.88-1.38)           | 0.97 (0.67-1.40)                     | 0.72 (0.45-1.15)   | 0.423       |                   |
| Alcohol consumption week/month                                   |         |       |                  |                            |                                      |                    |             |                   |
| Never                                                            | 243,474 | 680   | 1.00 (reference) | 1.32 (1.05-1.66)           | 0.91 (0.60-1.37)                     | 1.02 (0.67-1.56)   | 0.108       | 0.089             |
| 1 week or over                                                   | 162,583 | 786   | 1.00 (reference) | 0.88 (0.68-1.13)           | 1.03 (0.72-1.47)                     | 0.79 (0.50-1.25)   | 0.576       |                   |
| Physical activity, time/week                                     |         |       |                  |                            |                                      |                    |             |                   |
| Never                                                            | 213,675 | 753   | 1.00 (reference) | 1.21 (0.96-1.51)           | 1.08 (0.75-1.54)                     | 1.01 (0.68-1.51)   | 0.434       | 0.307             |
| 1 time or over                                                   | 192,382 | 713   | 1.00 (reference) | 0.95 (0.73-1.22)           | 0.87 (0.58-1.30)                     | 0.78 (0.48-1.27)   | 0.674       |                   |
| CLD                                                              |         |       |                  |                            |                                      |                    |             |                   |
| Yes                                                              | 83,359  | 490   | 1.00 (reference) | 0.85 (0.64-1.12)           | 1.16 (0.81-1.70)                     | 0.93 (0.61-1.41)   | 0.497       | 0.049             |
| No                                                               | 322,698 | 976   | 1.00 (reference) | 1.16 (0.94-1.44)           | 0.70 (0.46-1.06)                     | 0.73 (0.46-1.16)   | 0.077       |                   |
| GERD                                                             |         |       |                  |                            |                                      |                    |             |                   |
| Yes                                                              | 86,134  | 253   | 1.00 (reference) | 1.03 (0.76-1.38)           | 0.86 (0.57-1.32)                     | 0.90 (0.59-1.37)   | 0.850       | 0.249             |

|     |         |       |                  |                  |                  |                  |       |       |
|-----|---------|-------|------------------|------------------|------------------|------------------|-------|-------|
| No  | 319,923 | 1,213 | 1.00 (reference) | 1.27 (1.02-1.58) | 1.32 (0.91-1.89) | 1.27 (0.78-2.09) | 0.070 |       |
| ASP |         |       |                  |                  |                  |                  |       |       |
| Yes | 30,368  | 146   | 1.00 (reference) | 0.70 (0.37-1.34) | 1.66 (0.70-3.09) | 0.71 (0.26-1.92) | 0.207 | 0.123 |
| No  | 375,689 | 1,320 | 1.00 (reference) | 1.12 (0.94-1.34) | 0.89 (0.66-1.20) | 0.93 (0.67-1.28) | 0.439 |       |
| NSA |         |       |                  |                  |                  |                  |       |       |
| Yes | 337,985 | 1,149 | 1.00 (reference) | 1.13 (0.94-1.35) | 0.92 (0.68-1.25) | 0.91 (0.65-1.28) | 0.497 | 0.566 |
| No  | 68,072  | 317   | 1.00 (reference) | 0.90 (0.58-1.41) | 1.29 (0.73-2.25) | 0.88 (0.41-1.87) | 0.762 |       |

The estimates were based on fully adjusted models: age, sex, household income, body mass index, systolic blood pressure, fasting serum glucose, smoking, alcohol consumption, exercise frequency, and Charlson comorbidity index.

Acronyms: aHR, adjusted hazard ratio; CI, confidence interval; DDD, defined daily dose; CLD, Chronic Liver Disease; GERD, Gastroesophageal Reflux Disease; ASP, Aspirin; NSA, Non-Steroidal anti-inflammatory drugs.
